# Supplementary material for: Systems Level Analysis and Identification of Pathways and Networks Associated with Liver Fibrosis
Source: PLoS One. 2014 Nov 7;9(11):e112193. doi: 10.1371/journal.pone.0112193 (PMC4224449; doi:10.1371/journal.pone.0112193)
Supplement: Figure S2 — Treemap view of gene ontology (GO) biological process-term enrichment for genes in the network module M5. (DOCX) [file pone.0112193.s002.docx]

**Supplementary materials**

**Systems level analysis and identification of pathways and networks associated with liver fibrosis**

Mohamed Diwan M. AbdulHameed,1 Gregory J. Tawa,1 Kamal Kumar,1 Danielle L. Ippolito,2 John A. Lewis,2 Jonathan D. Stallings,2 and Anders Wallqvist1

1Department of Defense Biotechnology High Performance Computing Software Applications Institute, Telemedicine and Advanced Technology Research Center, U.S. Army Medical Research and Materiel Command, Fort Detrick, Maryland, USA

2U.S. Army Center for Environmental Health Research, Fort Detrick, MD, USA

**
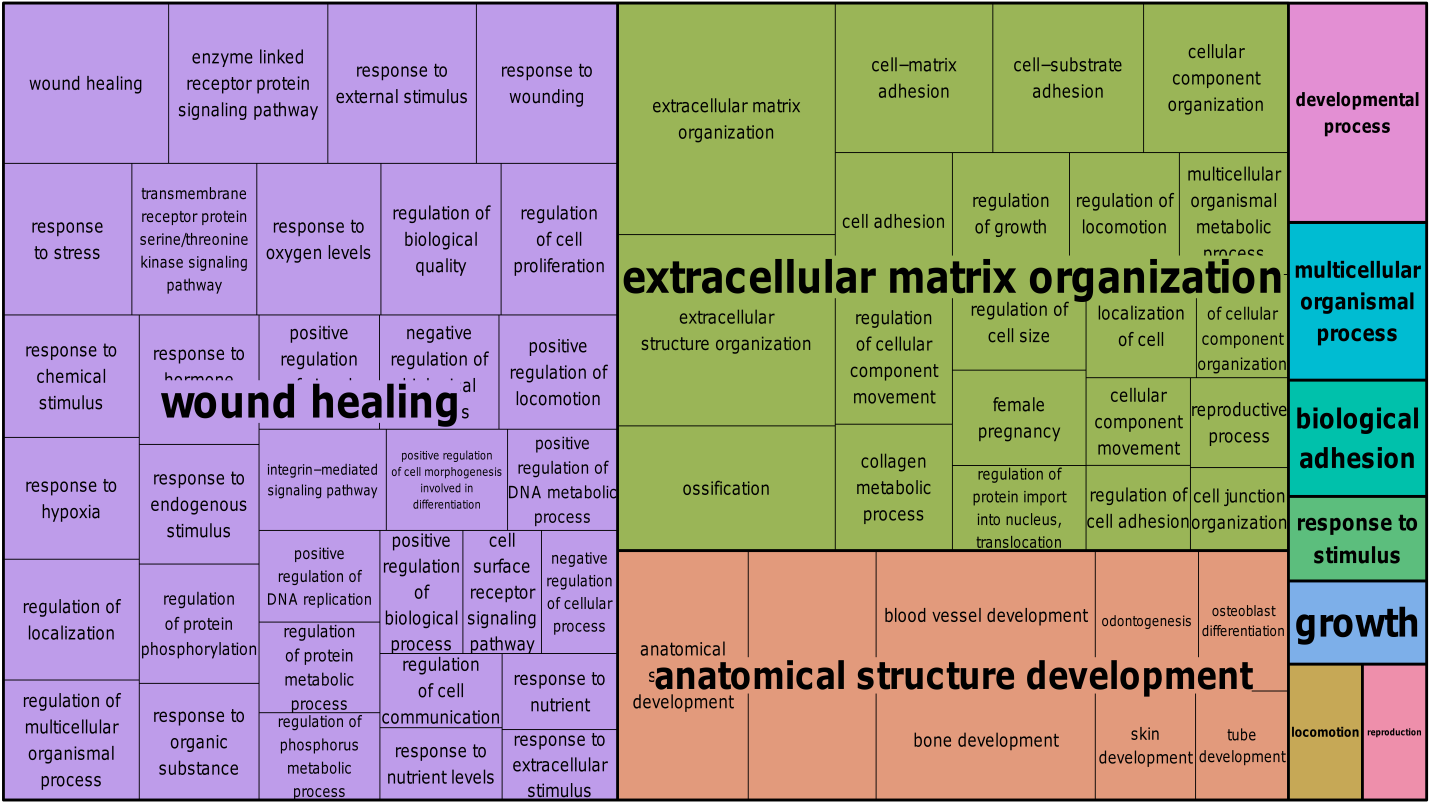
**

**Figure S2:** GO biological process-term enrichment for genes in liver fibrosis-relevant network module M5.
